# Supplementary material
Source: Springer Nature journal article supplement (https://www.springermedizin.de/resource/supplementary/12888_2011_1034_MOESM3_ESM.pdf/9479666)

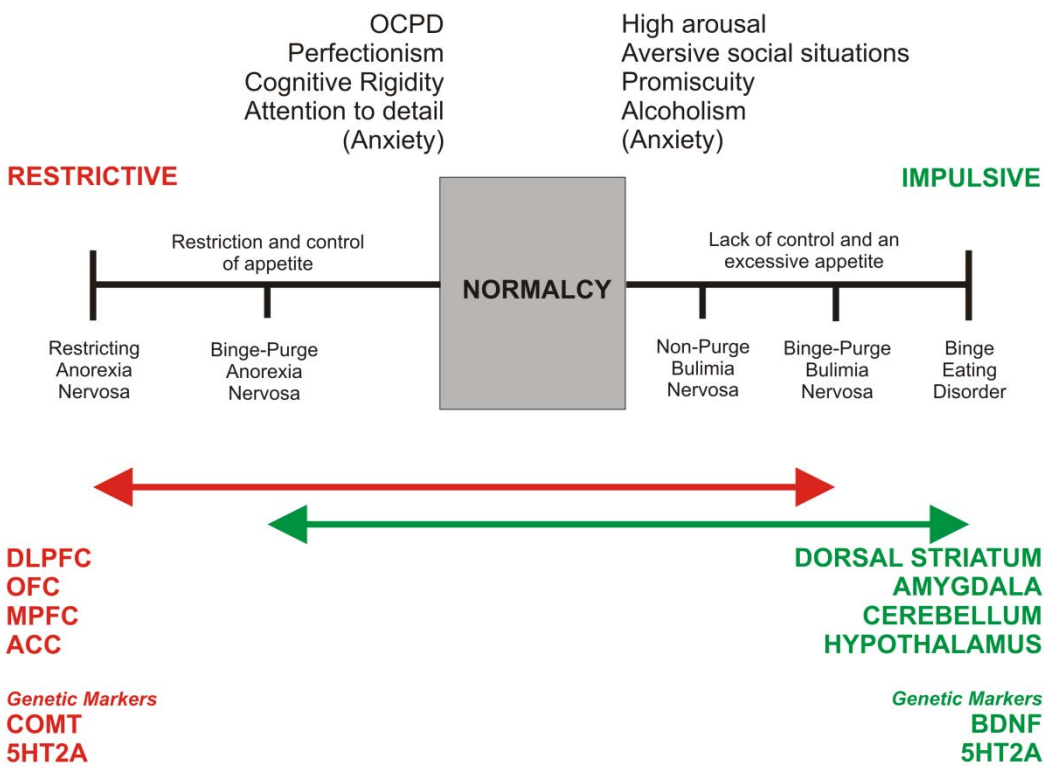

Supplement: MOESM3 [file 9479666]
